# Supplementary material for: Synthesis, Characterization, Theoretical and Experimental Anticancer Evaluation of Novel Cocrystals of 5-Fluorouracil and Schiff Bases against SW480 Colorectal Carcinoma
Source: MDPI journal article supplement (doi:10.3390/pharmaceutics15071929), 2023-07-11
Supplement: s1 [file s1]

# **Synthesis, Characterization, Theoretical and Experimental Anticancer Evaluation of Novel Cocrystals of 5-Fluorouracil and Schiff bases against SW480 Colorectal Carcinoma**

Farhat Jubeen<sup>1</sup>, Ishrat Jubeen<sup>2</sup>, Usman Aftab<sup>3</sup>, Sadia Noor<sup>2,4</sup>, Mah e Hareem<sup>2</sup>, Misbah Sultan<sup>5\*</sup>, Mohsin Kazi<sup>6\*</sup>

## **Supplementary Material**

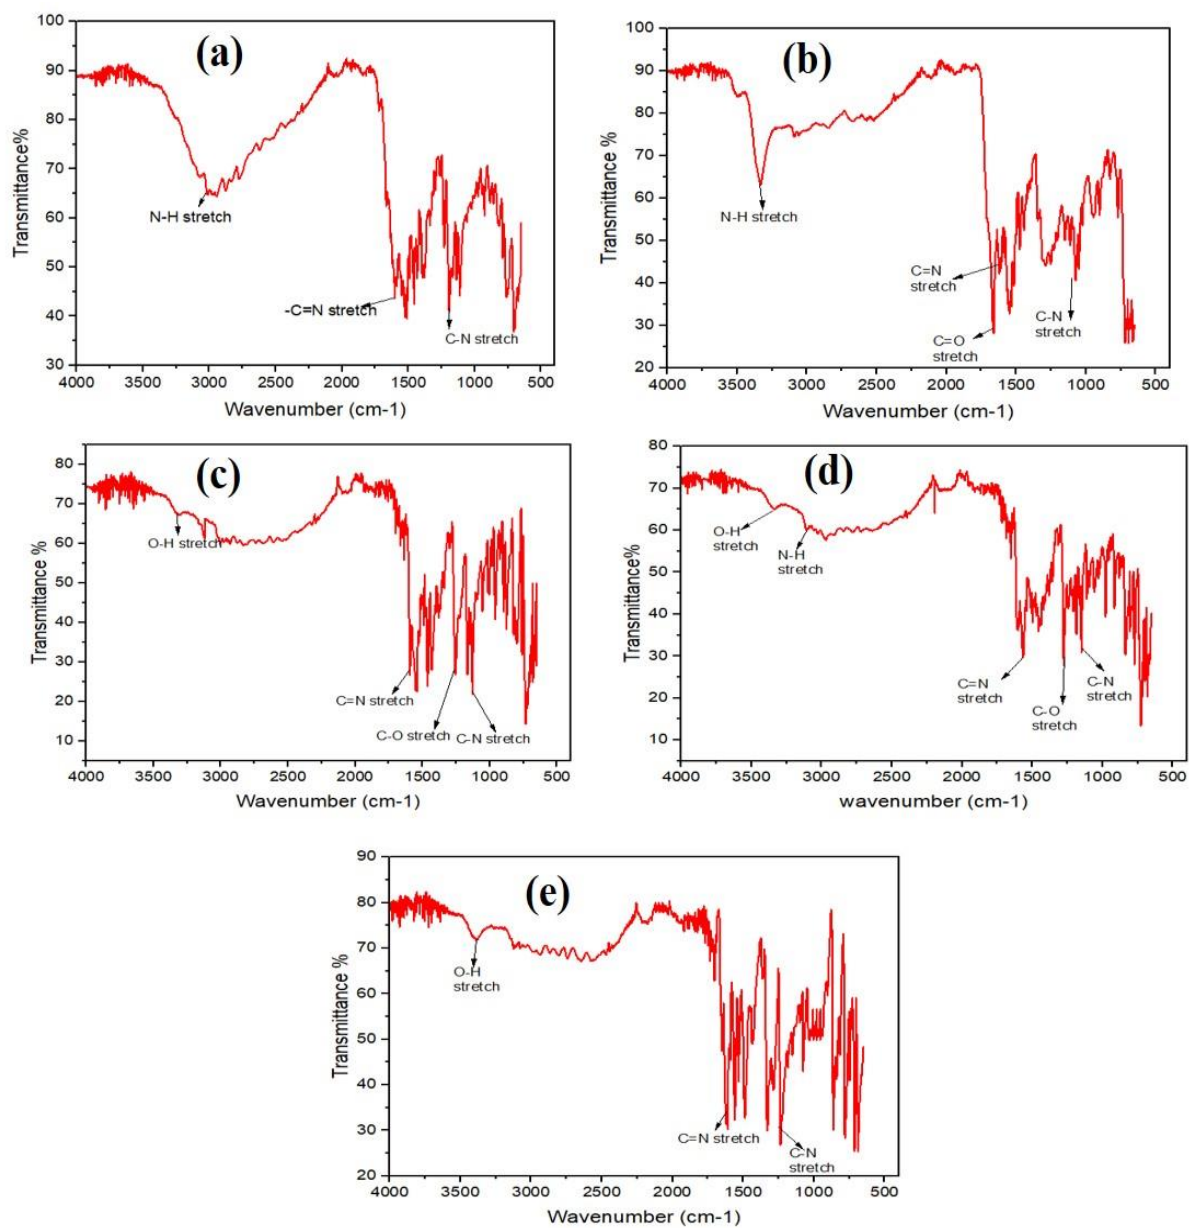

**Figure S1:** FTIR analysis of Schiff bases (a); BA (b); BU (c); SA (d); SPH (e) HBA

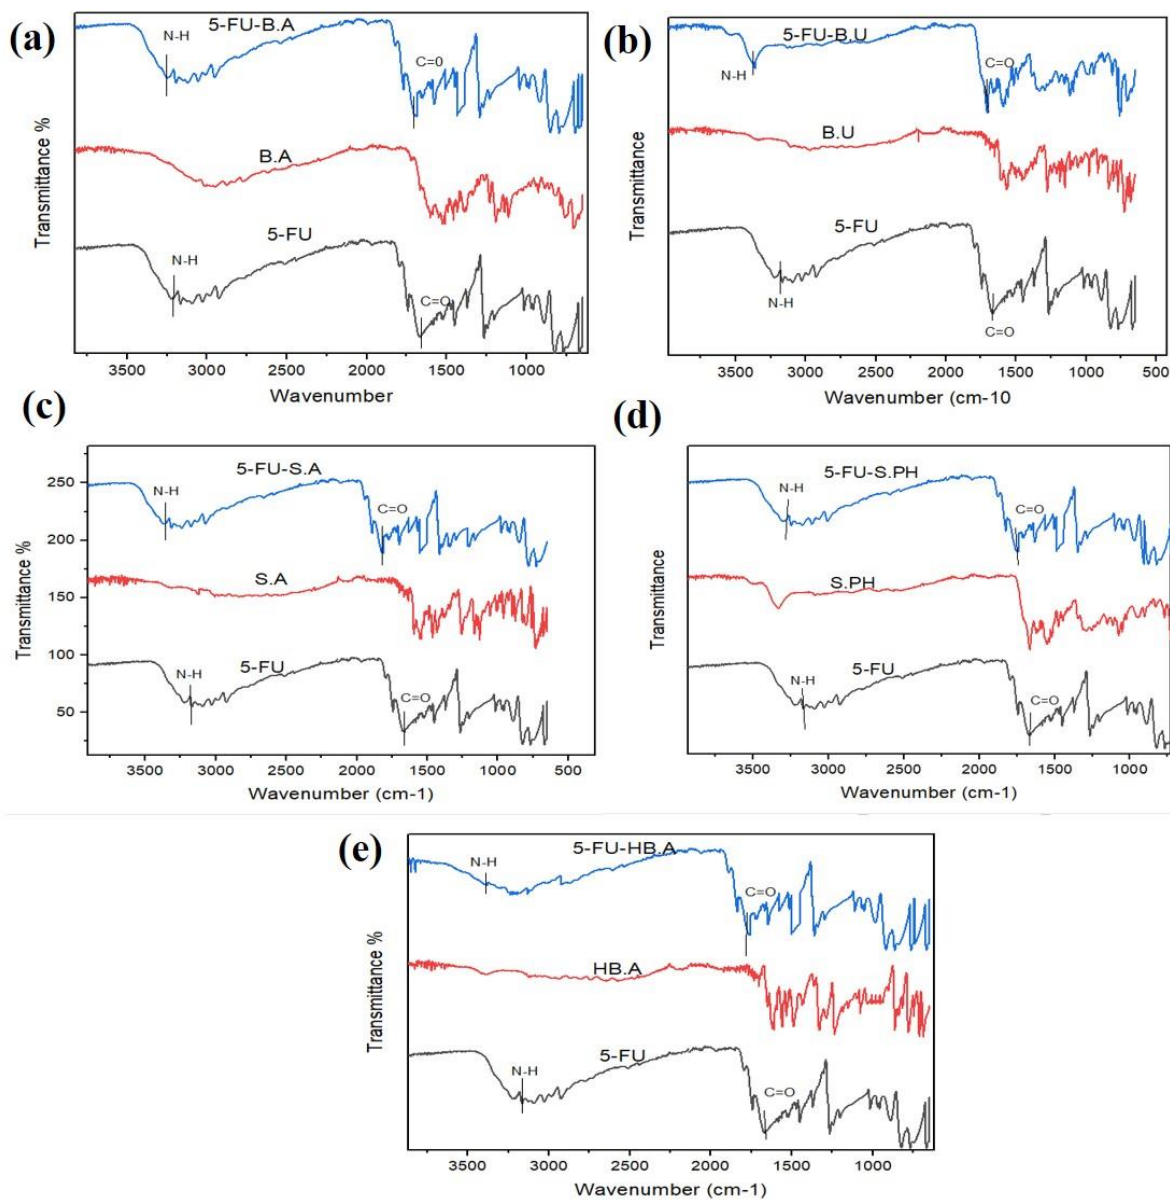

**Figure S2:** Comparative FTIR analysis of 5-FU and Schiff bases with corresponding cocrystals: (a) 5FU-BA; (b) 5FU-BU; (c) 5FU-SA; (d) 5FU-SPH; (e) 5FU-HBA
